# Supplementary material
Source: Springer Nature journal article supplement (https://www.springermedizin.de/resource/supplementary/12887_2013_1220_MOESM1_ESM.pdf/9476748)
Supplement: MOESM1 [file 9476748]

Additional File 1: Codes Used to Identify Comorbid Conditions

| <b>Comorbid Conditions</b>                                   |                                                                                                                                                                                                                                                                                                                                                            |
|--------------------------------------------------------------|------------------------------------------------------------------------------------------------------------------------------------------------------------------------------------------------------------------------------------------------------------------------------------------------------------------------------------------------------------|
| <b>Description</b>                                           | <b>ICD-9-CM Diagnosis Code</b>                                                                                                                                                                                                                                                                                                                             |
| Congenital Heart Disease<br>Chronic Lung Disease             | 424.x,.425.3x, 425.4x, 425.8x, 745.xx – 747.xx<br><br>770.7x,227.02,333.71,356.1,358.1,747.83,748.4,<br>748.5,748.6,750.3,756.6,770.12,770.81,770.82,<br>240-242.xx,243,244.x,246.1,277.81,277.82,<br>335.0,335.10,335.11,335.19,335.21,343.x,359.0,<br>359.1,359.21,359.22,359.6-359.7x,446.5<br>551.3,552.3,553.3,710.3,756.6,769,770.0,770.7x,<br>775.3 |
| Muscular dystrophy                                           | 359.0x-359.1x.                                                                                                                                                                                                                                                                                                                                             |
| Anterior horn cell disease                                   | 335.xx                                                                                                                                                                                                                                                                                                                                                     |
| Intraventricular hemorrhage                                  | 772.1x                                                                                                                                                                                                                                                                                                                                                     |
| Immunodeficiency                                             | 279.x                                                                                                                                                                                                                                                                                                                                                      |
| HIV                                                          | 042.xx, V08.xx, 079.51-079.53                                                                                                                                                                                                                                                                                                                              |
| Sickle Cell Anemia                                           | 282.4x-282.6x                                                                                                                                                                                                                                                                                                                                              |
| Hydrocephalus                                                | 742.3x, 741.0x                                                                                                                                                                                                                                                                                                                                             |
| Periventricular leukomalacia                                 | 779.7x                                                                                                                                                                                                                                                                                                                                                     |
| Necrotizing enterocolitis                                    | 777.5x                                                                                                                                                                                                                                                                                                                                                     |
| Trisomy 21                                                   | 758.0                                                                                                                                                                                                                                                                                                                                                      |
| Cerebral palsy                                               | 343.xx, 333.71                                                                                                                                                                                                                                                                                                                                             |
| Other neuromuscular, immunological<br>and genetic conditions | 740.0x-759.x (except for codes in this range that<br>are classified elsewhere), 246.1,258.1, 356.1,<br>277.81, 277.82,446.5,551.3,335.0,<br>335.10,335.11,335.19,710.3                                                                                                                                                                                     |
| Cystic Fibrosis                                              | 277.0x                                                                                                                                                                                                                                                                                                                                                     |
| Retinopathy of prematurity                                   | 362.21, 362.29                                                                                                                                                                                                                                                                                                                                             |
| Failure to Thrive                                            | 783.4x                                                                                                                                                                                                                                                                                                                                                     |
| <b>Description</b>                                           | <b>ICD-9-CM Procedure Code</b>                                                                                                                                                                                                                                                                                                                             |
| Congenital Heart Disease                                     | 35.41                                                                                                                                                                                                                                                                                                                                                      |
| Chronic Lung Disease                                         | V46.2                                                                                                                                                                                                                                                                                                                                                      |
| <b>Description</b>                                           | <b>CPT Codes</b>                                                                                                                                                                                                                                                                                                                                           |
| Congenital Heart Disease                                     | 92992, 92993                                                                                                                                                                                                                                                                                                                                               |
| Chronic Lung Disease                                         | 4030F                                                                                                                                                                                                                                                                                                                                                      |
| <b>Description</b>                                           | <b>Revenue Codes</b>                                                                                                                                                                                                                                                                                                                                       |
| Chronic Lung Disease                                         | 0277, 060x                                                                                                                                                                                                                                                                                                                                                 |
| <b>Description</b>                                           | <b>HCPCS Codes</b>                                                                                                                                                                                                                                                                                                                                         |
| Chronic Lung Disease                                         | E0424-E0444, E0455, E1353, E1390, E1391, K0738                                                                                                                                                                                                                                                                                                             |
| <b>Description</b>                                           | <b>Medication Name (Generic)</b>                                                                                                                                                                                                                                                                                                                           |

|                          |                                                                                                                                                                                                                                                                                                                                                                                                                                                                                                                                                                                                                                                                                                                                                                                                                                                                                                                                                                                                                                                                                                                                                                                                                                                                                                                                                                                                                                                                                                                                                                                                                                                                                                                                                                                                                                                                                                                                                                                                                                              |
|--------------------------|----------------------------------------------------------------------------------------------------------------------------------------------------------------------------------------------------------------------------------------------------------------------------------------------------------------------------------------------------------------------------------------------------------------------------------------------------------------------------------------------------------------------------------------------------------------------------------------------------------------------------------------------------------------------------------------------------------------------------------------------------------------------------------------------------------------------------------------------------------------------------------------------------------------------------------------------------------------------------------------------------------------------------------------------------------------------------------------------------------------------------------------------------------------------------------------------------------------------------------------------------------------------------------------------------------------------------------------------------------------------------------------------------------------------------------------------------------------------------------------------------------------------------------------------------------------------------------------------------------------------------------------------------------------------------------------------------------------------------------------------------------------------------------------------------------------------------------------------------------------------------------------------------------------------------------------------------------------------------------------------------------------------------------------------|
| Congenital Heart Disease | <p> Acebutolol Hydrochloride, Amiloride Hydrochloride, Amiloride Hydrochloride/Hydrochlorothiazide, Amlodipine Besylate/Benazepril Hydrochloride, Atenolol, Atenolol/Chlorthalidone, Benazepril Hydrochloride, Benazepril Hydrochloride/Hydrochlorothiazide, Bendroflumethiazide, Bendroflumethiazide/Nadolol, Bendroflumethiazide/Rauwolfia Serpentina, Benzthiazide, Betaxolol Hydrochloride, Bisoprolol Fumarate, Bisoprolol Fumarate/Hydrochlorothiazide, Bumetanide, Candesartan Cilexetil, Candesartan Cilexetil/Hydrochlorothiazide, Captopril, Captopril/Hydrochlorothiazide, Carteolol Hydrochloride, Carvedilol, Chlorothiazide, Chlorothiazide Sodium, Chlorothiazide/Methyldopa, Chlorothiazide/Reserpine, Chlorthalidone, Chlorthalidone/Clonidine Hydrochloride, Chlorthalidone/Reserpine, Cyclandelate, Deserpidine/Hydrochlorothiazide, Deserpidine/Methyclothiazide, Diazoxide, Digoxin, Digoxin Immune Fab (ovine), Diltiazem Maleate/Enalapril Maleate, Enalapril Maleate, Enalapril Maleate/Felodipine, Enalapril Maleate/Hydrochlorothiazide, Enalaprilat, Epoprostenol Sodium, Eprosartan Mesylate, Eprosartan Mesylate/Hydrochlorothiazide, Esmolol Hydrochloride, Ethacrynic Acid, Ethaverine Hydrochloride, Ethaverine/Apap/Salicyl/Atrop, Ethaverine/B-complex, Fenoldopam Mesylate, Fosinopril Sodium, Fosinopril Sodium/Hydrochlorothiazide, Furosemide, Guanethidine Monosulfate/Hydrochlorothiazide, HCTZ/Hydralazine HCl/Reserpine, Hydralazine Hydrochloride, Hydralazine Hydrochloride/Hydrochlorothiazide, Hydralazine Hydrochloride/Isosorbide Dinitrate, Hydralazine Hydrochloride/Reserpine, Hydrochlorothiazide, Hydrochlorothiazide/Irbesartan, Hydrochlorothiazide/Labetalol Hydrochloride, Hydrochlorothiazide/Losartan Potassium, Hydrochlorothiazide/Methyldopa, Hydrochlorothiazide/Metoprolol Tartrate, Hydrochlorothiazide/Moexipril Hydrochloride, Hydrochlorothiazide/Olmesartan Medoxomil, Hydrochlorothiazide/Propranolol Hydrochloride, Hydrochlorothiazide/Quinapril Hydrochloride, </p> |
|--------------------------|----------------------------------------------------------------------------------------------------------------------------------------------------------------------------------------------------------------------------------------------------------------------------------------------------------------------------------------------------------------------------------------------------------------------------------------------------------------------------------------------------------------------------------------------------------------------------------------------------------------------------------------------------------------------------------------------------------------------------------------------------------------------------------------------------------------------------------------------------------------------------------------------------------------------------------------------------------------------------------------------------------------------------------------------------------------------------------------------------------------------------------------------------------------------------------------------------------------------------------------------------------------------------------------------------------------------------------------------------------------------------------------------------------------------------------------------------------------------------------------------------------------------------------------------------------------------------------------------------------------------------------------------------------------------------------------------------------------------------------------------------------------------------------------------------------------------------------------------------------------------------------------------------------------------------------------------------------------------------------------------------------------------------------------------|

|                      |                                                                                                                                                                                                                                                                                                                                                                                                                                                                                                                                                                                                                                                                                                                                                                                                                                                                                                                                                                                                                                                                                                                                                                                                                                              |
|----------------------|----------------------------------------------------------------------------------------------------------------------------------------------------------------------------------------------------------------------------------------------------------------------------------------------------------------------------------------------------------------------------------------------------------------------------------------------------------------------------------------------------------------------------------------------------------------------------------------------------------------------------------------------------------------------------------------------------------------------------------------------------------------------------------------------------------------------------------------------------------------------------------------------------------------------------------------------------------------------------------------------------------------------------------------------------------------------------------------------------------------------------------------------------------------------------------------------------------------------------------------------|
|                      | <p>Hydrochlorothiazide/Reserpine,<br/> Hydrochlorothiazide/Spirolactone,<br/> Hydrochlorothiazide/Telmisartan,<br/> Hydrochlorothiazide/Timolol Maleate,<br/> Hydrochlorothiazide/Triamterene,<br/> Hydrochlorothiazide/Valsartan, Hydroflumethiazide,<br/> Hydroflumethiazide/Reserpine, Indapamide,<br/> Irbesartan, Kcl/Bendroflumethiazide, Labetalol<br/> Hydrochloride, Lisinopril,<br/> Lisinopril/Hydrochlorothiazide, Losartan Potassium,<br/> Methyclothiazide, Methyclothiazide/Reserpine,<br/> Metolazone, Metoprolol Succinate, Metoprolol<br/> Tartrate, Minoxidil, Moexipril Hydrochloride,<br/> Nadolol, Nylidrin Hydrochloride, Olmesartan<br/> Medoxomil, Papaverine Hydrochloride,<br/> Papaverine/Codeine, Penbutolol Sulfate, Perindopril<br/> Erbumine, Pindolol, Polythiazide,<br/> Polythiazide/Prazosin Hydrochloride,<br/> Polythiazide/Reserpine, Propranolol Hydrochloride,<br/> Quinapril Hydrochloride, Ramipril,<br/> Reserpine/Trichlormethiazide, Spirolactone,<br/> Telmisartan, Timolol Maleate, Tolazoline<br/> Hydrochloride, Torsemide, Trandolapril,<br/> Trandolapril/Verapamil Hydrochloride, Treprostinil<br/> Sodium, Triamterene, Trichlormethiazide,<br/> Trimethaphan Camsylate, Valsartan</p> |
| Chronic Lung Disease | <p>arformoterol, formoterol, salmeterol,<br/> fluticasone/salmeterol, budesonide/formoterol,<br/> albuterol, bitolterol, epinephrine, isoetharine,<br/> isoproterenol, levalbuterol, metaproterenol, pirbuterol,<br/> terbutaline, aminophylline, dyphylline, oxtriphylline,<br/> theophylline, ipratropium, bendroflumethiazide,<br/> benzthiazide, chlorothiazide, chlorthalidone,<br/> hydrochlorothiazide (HCTZ), hydroflumethiazide,<br/> indapamide, methyclothiazide, metolazone,<br/> polythiazide, trichlormethiazide, bumetanide,<br/> ethacrynic acid, furosemide, torsemide, amiloride,<br/> spironolactone, triamterene, atenolol/chlorthalidone,<br/> bisoprolol/HCTZ, metoprolol/HCTZ,<br/> nadolol/bendroflumethiazide, propranolol/HCTZ,<br/> timolol/HCTZ, benazepril/HCTZ, captopril/HCTZ,<br/> enalapril/HCTZ, fosinopril/HCTZ, lisinopril/HCTZ,<br/> moexipril/HCTZ, quinapril/HCTZ,<br/> candesartan/HCTZ, eprosartan/HCTZ,<br/> irbesartan/HCTZ, losartan/HCTZ, olmesartan/HCTZ,<br/> telmisartan/HCTZ, valsartan/HCTZ, amiloride/HCTZ,</p>                                                                                                                                                                           |

|  |                                                                                                                                  |
|--|----------------------------------------------------------------------------------------------------------------------------------|
|  | spironolactone/HCTZ, triamterene/HCTZ,<br>prazosin/polythiazide, clonidine/chlorthalidone,<br>dexamethasone, methylprednisolone, |
|--|----------------------------------------------------------------------------------------------------------------------------------|
